# Supplementary material
Source: PubMed Central journal article supplement (PMC3032804)
Supplement: supp_kwq379_kwq379_Web_Tables.pdf [file supp_kwq379_kwq379_Web_Tables.pdf]

## Web Tables

**Web Table 1: Pooled Logistic Regression Models Evaluating the Association of Cumulative Socioeconomic Position Score With Incidence of Type 2 Diabetes (Using a More Conservative Diagnosis Criteria for Type 2 Diabetes) , Framingham Offspring Study, United States (1971-1975).**

| Cumulative SEP Score <sup>a</sup> | N   | No. events | Model Adjustment |            |          |            |              |            |              |            |             |            |                                             |            |
|-----------------------------------|-----|------------|------------------|------------|----------|------------|--------------|------------|--------------|------------|-------------|------------|---------------------------------------------|------------|
|                                   |     |            | Age              |            | Age, BMI |            | Age, Smoking |            | Age, Alcohol |            | Age, Height |            | Age, Conventional Risk Factors <sup>b</sup> |            |
|                                   |     |            | OR               | 95% CI     | OR       | 95% CI     | OR           | 95% CI     | OR           | 95% CI     | OR          | 95% CI     | OR                                          | 95% CI     |
| Women                             |     |            |                  |            |          |            |              |            |              |            |             |            |                                             |            |
| Low (0 -1)                        | 309 | 37         | 1.74             | 0.95, 3.18 | 1.43     | 0.77, 2.64 | 1.75         | 0.94, 3.26 | 1.63         | 0.90, 2.95 | 1.81        | 0.98, 3.37 | 1.46                                        | 0.76, 2.77 |
| Medium (2-3)                      | 397 | 32         | 1.58             | 0.85, 2.89 | 1.40     | 0.75, 2.61 | 1.58         | 0.86, 2.92 | 1.51         | 0.82, 2.77 | 1.62        | 0.87, 3.04 | 1.43                                        | 0.74, 2.73 |
| High (4-6)                        | 285 | 15         | 1.00             |            | 1.00     |            | 1.00         |            | 1.00         |            | 1.00        |            | 1.00                                        |            |
| Men                               |     |            |                  |            |          |            |              |            |              |            |             |            |                                             |            |
| Low (0 -1)                        | 273 | 43         | 0.91             | 0.58, 1.43 | 0.89     | 0.56, 1.42 | 0.82         | 0.52, 1.30 | 0.92         | 0.59, 1.44 | 0.88        | 0.56, 1.40 | 0.81                                        | 0.50, 1.31 |
| Medium (2-3)                      | 272 | 24         | 0.56             | 0.33, 0.94 | 0.51     | 0.30, 0.87 | 0.53         | 0.31, 0.89 | 0.56         | 0.33, 0.94 | 0.55        | 0.33, 0.93 | 0.49                                        | 0.29, 0.83 |
| High (4-6)                        | 357 | 49         | 1.00             |            | 1.00     |            | 1.00         |            | 1.00         |            | 1.00        |            | 1.00                                        |            |

Abbreviation: BMI, body mass index; CI, confidence interval; OR, odds ratio; SEP, socioeconomic position.

<sup>a</sup> Analyses used a cumulative SEP score including father's education, own education, and own occupation. Scores were calculated for each SEP measure separately and then summed (range, 0–6): father's education: <high school = 0, high school = 1, >high school = 2; own education: ≤12 years = 0, 13–16 years = 1, ≥17 years = 2; own occupation: laborer = 0, clerical/sales/homemaker = 1, professional/executive/ supervisory/technical = 2.

<sup>b</sup> Conventional risk factors include body mass index, smoking, alcohol and height.

**Web Table 2: Pooled Logistic Regression Models Evaluating the Association of Childhood (Father's Education and Father's Occupation), Young Adulthood (own Education) and Active Professional Life (own Occupation) Socioeconomic Position With Incidence of Type 2 Diabetes (Using a More Conservative Diagnosis Criteria for Type 2 Diabetes), Framingham Offspring Study, United States (1971-1975).**

| SEP Measure                      | SEP Level                                         | N   | No. Events | Model Adjustment |            |                                      |            |                                             |            |                                                                                 |            |  |
|----------------------------------|---------------------------------------------------|-----|------------|------------------|------------|--------------------------------------|------------|---------------------------------------------|------------|---------------------------------------------------------------------------------|------------|--|
|                                  |                                                   |     |            | Age              |            | Age, other SEP measures <sup>a</sup> |            | Age, conventional risk factors <sup>b</sup> |            | Age, other SEP measures <sup>a</sup> and conventional risk factors <sup>b</sup> |            |  |
|                                  |                                                   |     |            | OR               | 95% CI     | OR                                   | 95% CI     | OR                                          | 95% CI     | OR                                                                              | 95% CI     |  |
| <b>Women</b>                     |                                                   |     |            |                  |            |                                      |            |                                             |            |                                                                                 |            |  |
| Father's Occupation <sup>c</sup> | Laborer                                           | 352 | 36         | 1.42             | 0.88, 2.27 | 1.34                                 | 0.80, 2.23 | 1.08                                        | 0.65, 1.79 | 1.06                                                                            | 0.62, 1.80 |  |
|                                  | Clerical or Sales                                 | 96  | 8          | 1.38             | 0.64, 2.97 | 1.53                                 | 0.71, 3.30 | 1.37                                        | 0.60, 3.13 | 1.51                                                                            | 0.65, 3.49 |  |
|                                  | Professional, Executive, Supervisory or Technical | 384 | 25         | 1.00             |            | 1.00                                 |            | 1.00                                        |            | 1.00                                                                            |            |  |
| Father's Education               | <High School                                      | 507 | 54         | 1.32             | 0.70, 2.48 | 1.08                                 | 0.51, 2.27 | 1.22                                        | 0.64, 2.34 | 1.07                                                                            | 0.50, 2.29 |  |
|                                  | High School                                       | 251 | 15         | 1.06             | 0.47, 2.42 | 1.03                                 | 0.45, 2.38 | 1.09                                        | 0.46, 2.56 | 1.07                                                                            | 0.45, 2.55 |  |
|                                  | >High School                                      | 233 | 15         | 1.00             |            | 1.00                                 |            | 1.00                                        |            | 1.00                                                                            |            |  |
| Own Education                    | ≤12 years                                         | 438 | 48         | 2.32             | 0.84, 6.42 | 1.75                                 | 0.52, 5.83 | 2.12                                        | 0.70, 6.41 | 1.72                                                                            | 0.46, 6.36 |  |
|                                  | 13-16 years                                       | 441 | 32         | 1.72             | 0.61, 4.86 | 1.47                                 | 0.49, 4.47 | 1.77                                        | 0.58, 5.43 | 1.58                                                                            | 0.47, 5.33 |  |
|                                  | >16 years                                         | 112 | 4          | 1.00             |            | 1.00                                 |            | 1.00                                        |            | 1.00                                                                            |            |  |
| Own Occupation                   | Laborer                                           | 90  | 11         | 2.17             | 0.92, 5.14 | 1.69                                 | 0.62, 4.56 | 1.64                                        | 0.64, 4.15 | 1.43                                                                            | 0.51, 3.98 |  |
|                                  | Clerical or Sales                                 | 293 | 28         | 1.87             | 0.93, 3.83 | 1.57                                 | 0.73, 3.37 | 1.71                                        | 0.82, 3.56 | 1.50                                                                            | 0.69, 3.27 |  |
|                                  | Homemaker                                         | 381 | 35         | 1.66             | 0.82, 3.34 | 1.40                                 | 0.67, 2.93 | 1.56                                        | 0.75, 3.23 | 1.38                                                                            | 0.64, 2.97 |  |
|                                  | Professional, Executive, Supervisory or Technical | 227 | 10         | 1.00             |            | 1.00                                 |            | 1.00                                        |            | 1.00                                                                            |            |  |
| <b>Men</b>                       |                                                   |     |            |                  |            |                                      |            |                                             |            |                                                                                 |            |  |
| Father's Occupation <sup>c</sup> | Laborer                                           | 316 | 40         | 0.91             | 0.59, 1.39 | 0.91                                 | 0.59, 1.42 | 0.81                                        | 0.52, 1.25 | 0.80                                                                            | 0.51, 1.26 |  |
|                                  | Clerical or Sales                                 | 74  | 7          | 0.88             | 0.41, 1.89 | 0.91                                 | 0.42, 1.95 | 0.72                                        | 0.31, 1.64 | 0.73                                                                            | 0.32, 1.65 |  |
|                                  | Professional, Executive, Supervisory or Technical | 392 | 47         | 1.00             |            | 1.00                                 |            | 1.00                                        |            | 1.00                                                                            |            |  |
| Father's Education               | <High School                                      | 459 | 68         | 1.23             | 0.71, 2.12 | 1.25                                 | 0.69, 2.28 | 1.13                                        | 0.63, 2.05 | 1.11                                                                            | 0.58, 2.12 |  |
|                                  | High School                                       | 211 | 24         | 1.41             | 0.73, 2.70 | 1.43                                 | 0.73, 2.82 | 1.40                                        | 0.71, 2.76 | 1.38                                                                            | 0.70, 2.72 |  |
|                                  | >High School                                      | 232 | 24         | 1.00             |            | 1.00                                 |            | 1.00                                        |            | 1.00                                                                            |            |  |
| Own Education                    | ≤12 years                                         | 316 | 45         | 1.00             | 0.61, 1.64 | 1.01                                 | 0.52, 1.94 | 0.88                                        | 0.53, 1.45 | 1.06                                                                            | 0.54, 2.04 |  |
|                                  | 13-16 years                                       | 368 | 44         | 0.94             | 0.57, 1.55 | 1.00                                 | 0.58, 1.73 | 0.70                                        | 0.42, 1.18 | 0.81                                                                            | 0.46, 1.41 |  |
|                                  | >16 years                                         | 218 | 27         | 1.00             |            | 1.00                                 |            | 1.00                                        |            | 1.00                                                                            |            |  |
| Own Occupation <sup>d</sup>      | Laborer                                           | 325 | 45         | 0.89             | 0.59, 1.34 | 0.85                                 | 0.52, 1.39 | 0.76                                        | 0.50, 1.17 | 0.72                                                                            | 0.43, 1.19 |  |
|                                  | Clerical or Sales                                 | 114 | 10         | 0.54             | 0.27, 1.09 | 0.54                                 | 0.27, 1.10 | 0.47                                        | 0.22, 0.98 | 0.49                                                                            | 0.23, 1.05 |  |
|                                  | Professional, Executive, Supervisory or Technical | 461 | 61         | 1.00             |            | 1.00                                 |            | 1.00                                        |            | 1.00                                                                            |            |  |

Abbreviation: OR, odds ratio; CI, confidence interval, SEP, socioeconomic position.

<sup>a</sup> "Other SEP measures" refers to adjustment for measures of SEP other than the exposure of interest. For example analyses on father's education are adjusted for own education and own occupation.

<sup>b</sup> Conventional risk factors include body mass index, smoking, alcohol, and height.

<sup>c</sup> The study sample was reduced to 1,614 participants due to missing data on father's occupation (women: n=832, 76 T2D cases; men: n=782, 99 T2D cases)

<sup>d</sup> Two men were classified as homemakers and were excluded from own occupation analyses.

**Web Table 3: Pooled Logistic Regression Evaluating the Association of Social Mobility of Socioeconomic Position With Incidence of Type 2 Diabetes (Using a More Conservative Diagnosis Criteria for Type 2 Diabetes), Framingham Offspring Study, United States (1971-1975).**

| SEP Measure for Childhood/ Adulthood <sup>a</sup> | SEP Level in Childhood/ Adulthood | N   | No. Events | Model Adjustment |            |                                             |            |  |
|---------------------------------------------------|-----------------------------------|-----|------------|------------------|------------|---------------------------------------------|------------|--|
|                                                   |                                   |     |            | Age              |            | Age, Conventional Risk Factors <sup>b</sup> |            |  |
|                                                   |                                   |     |            | OR               | 95% CI     | OR                                          | 95% CI     |  |
| Women                                             |                                   |     |            |                  |            |                                             |            |  |
| Father's Education/ Own Education                 | Low/Low                           | 307 | 35         | 1.70             | 0.92, 3.17 | 1.49                                        | 0.78, 2.81 |  |
|                                                   | High/Low                          | 131 | 13         | 2.40             | 1.05, 5.51 | 2.33                                        | 0.98, 5.56 |  |
|                                                   | Low/High                          | 200 | 19         | 1.70             | 0.85, 3.40 | 1.73                                        | 0.86, 3.49 |  |
|                                                   | High/High                         | 353 | 17         | 1.00             |            | 1.00                                        |            |  |
| Father's Education/ Own Occupation                | Low/Low                           | 67  | 8          | 1.42             | 0.63, 3.21 | 1.12                                        | 0.48, 2.64 |  |
|                                                   | High/Low                          | 23  | 3          | 2.77             | 0.88, 8.72 | 1.92                                        | 0.41, 8.91 |  |
|                                                   | Low/High                          | 440 | 46         | 1.36             | 0.83, 2.23 | 1.25                                        | 0.76, 2.05 |  |
|                                                   | High/High                         | 461 | 27         | 1.00             |            | 1.00                                        |            |  |
| Men                                               |                                   |     |            |                  |            |                                             |            |  |
| Father's Education/ Own Education                 | Low/Low                           | 233 | 38         | 1.08             | 0.67, 1.73 | 1.05                                        | 0.64, 1.74 |  |
|                                                   | High/Low                          | 83  | 7          | 0.83             | 0.37, 1.85 | 0.97                                        | 0.43, 2.19 |  |
|                                                   | Low/High                          | 226 | 30         | 0.97             | 0.58, 1.62 | 0.87                                        | 0.51, 1.51 |  |
|                                                   | High/High                         | 360 | 41         | 1.00             |            | 1.00                                        |            |  |
| Father's Education/ Own Occupation                | Low/Low                           | 227 | 39         | 1.05             | 0.65, 1.70 | 0.89                                        | 0.54, 1.48 |  |
|                                                   | High/Low                          | 98  | 6          | 0.51             | 0.21, 1.25 | 0.38                                        | 0.15, 0.95 |  |
|                                                   | Low/High                          | 232 | 29         | 0.85             | 0.50, 1.42 | 0.72                                        | 0.42, 1.24 |  |
|                                                   | High/High                         | 345 | 42         | 1.00             |            | 1.00                                        |            |  |

Abbreviation: OR, odds ratio; CI, confidence interval, SEP, socioeconomic position.

<sup>a</sup> Measures of SEP were as follows: father's education (low: <high school, high: ≥high school), own education (low: ≤12 years, high: >12 years) and own occupation (low: laborer, high: housewife/ clerical/ sales/ professional/ executive/ supervisory/ technical).

<sup>b</sup> Conventional risk factors include body mass index, smoking, alcohol and height.

**Web Table 4: Pooled Logistic Regression Models Evaluating the Association of Cumulative Socioeconomic Position Score With Incidence of Type 2 Diabetes Using Father’s Occupation as a Measure Of Childhood Socioeconomic Position. , Framingham Offspring Study, United States (1971-1975).**

| Cumulative SEP Score <sup>a</sup> | N   | No. events | Model Adjustment |            |          |            |              |            |              |            |             |            |                                             |            |
|-----------------------------------|-----|------------|------------------|------------|----------|------------|--------------|------------|--------------|------------|-------------|------------|---------------------------------------------|------------|
|                                   |     |            | Age              |            | Age, BMI |            | Age, Smoking |            | Age, alcohol |            | Age, Height |            | Age, Conventional Risk Factors <sup>b</sup> |            |
|                                   |     |            | OR               | 95% CI     | OR       | 95% CI     | OR           | 95% CI     | OR           | 95% CI     | OR          | 95% CI     | OR                                          | 95% CI     |
| <b>Women<sup>c</sup></b>          |     |            |                  |            |          |            |              |            |              |            |             |            |                                             |            |
| Low (0 -1)                        | 199 | 24         | 1.47             | 0.87, 2.49 | 1.11     | 0.62, 1.99 | 1.48         | 0.86, 2.53 | 1.42         | 0.83, 2.41 | 1.46        | 0.87, 2.45 | 1.08                                        | 0.60, 1.96 |
| Medium (2-3)                      | 318 | 36         | 1.63             | 1.00, 2.64 | 1.46     | 0.88, 2.42 | 1.62         | 1.00, 2.64 | 1.63         | 1.00, 2.64 | 1.62        | 1.00, 2.62 | 1.46                                        | 0.89, 2.41 |
| High (4-6)                        | 315 | 16         | 1.00             |            | 1.00     |            | 1.00         |            | 1.00         |            | 1.00        |            | 1.00                                        |            |
| <b>Men<sup>c</sup></b>            |     |            |                  |            |          |            |              |            |              |            |             |            |                                             |            |
| Low (0 -1)                        | 169 | 25         | 0.99             | 0.60, 1.62 | 0.85     | 0.55, 1.29 | 0.88         | 0.53, 1.45 | 0.99         | 0.60, 1.63 | 0.97        | 0.59, 1.59 | 0.89                                        | 0.53, 1.48 |
| Medium (2-3)                      | 236 | 27         | 0.70             | 0.44, 1.13 | 0.53     | 0.32, 0.86 | 0.71         | 0.45, 1.11 | 0.76         | 0.48, 1.19 | 0.75        | 0.47, 1.18 | 0.68                                        | 0.43, 1.08 |
| High (4-6)                        | 377 | 47         | 1.00             |            | 1.00     |            | 1.00         |            | 1.00         |            | 1.00        |            | 1.00                                        |            |

Abbreviation: BMI, body mass index; CI, confidence interval; OR, odds ratio; SEP, socioeconomic position.

<sup>a</sup>Analyses used a cumulative SEP score including father's occupation, own education, and own occupation. Scores were calculated for each SEP measure separately and then summed (range, 0–6): father's occupation: laborer = 0, clerical/sales = 1, professional/executive/supervisory/technical = 2; own education: ≤12 years = 0, 13–16 years = 1, ≥17 years = 2; own occupation: laborer = 0, clerical/sales/homemaker = 1, professional/executive/supervisory/technical = 2.

<sup>b</sup>Conventional risk factors include body mass index, smoking, alcohol and height.

<sup>c</sup>The study sample was reduced to 1,614 participants due to missing data on father's occupation (women: n=832, 76 T2D cases; men: n=782, 99 T2D cases)

**Web Table 5: Pooled Logistic Regression Models Evaluating the Association of Childhood (Father's Occupation), Young Adulthood (own Education) and Active Professional Life (own Occupation) Socioeconomic Position With Incidence of Type 2 Diabetes, Framingham Offspring Study, United States (1971-1975).**

| SEP Measure                 | SEP Level                                         | N   | No. Events | Model Adjustment |            |                                      |            |                                             |            |                                                                                 |            |  |
|-----------------------------|---------------------------------------------------|-----|------------|------------------|------------|--------------------------------------|------------|---------------------------------------------|------------|---------------------------------------------------------------------------------|------------|--|
|                             |                                                   |     |            | Age              |            | Age, other SEP measures <sup>a</sup> |            | Age, conventional risk factors <sup>b</sup> |            | Age, other SEP measures <sup>a</sup> and conventional risk factors <sup>b</sup> |            |  |
|                             |                                                   |     |            | OR               | 95% CI     | OR                                   | 95% CI     | OR                                          | 95% CI     | OR                                                                              | 95% CI     |  |
| <b>Women<sup>c</sup></b>    |                                                   |     |            |                  |            |                                      |            |                                             |            |                                                                                 |            |  |
| Father's Occupation         | Laborer                                           | 352 | 38         | 1.25             | 0.80, 1.93 | 1.16                                 | 0.72, 1.86 | 0.94                                        | 0.58, 1.52 | 0.92                                                                            | 0.56, 1.50 |  |
|                             | Clerical or Sales                                 | 96  | 9          | 1.28             | 0.59, 2.77 | 1.51                                 | 0.70, 3.24 | 1.29                                        | 0.56, 2.95 | 1.47                                                                            | 0.63, 3.44 |  |
|                             | Professional, Executive, Supervisory or Technical | 384 | 29         | 1.00             |            | 1.00                                 |            | 1.00                                        |            | 1.00                                                                            |            |  |
| Own Education               | ≤12 years                                         | 343 | 39         | 3.01             | 0.94, 9.62 | 2.22                                 | 0.71, 6.97 | 2.59                                        | 0.75, 8.93 | 2.15                                                                            | 0.64, 7.20 |  |
|                             | 13-16 years                                       | 386 | 34         | 2.59             | 0.81, 8.24 | 1.72                                 | 0.58, 5.15 | 2.55                                        | 0.75, 8.64 | 1.80                                                                            | 0.56, 5.84 |  |
|                             | >16 years                                         | 103 | 3          | 1.00             |            | 1.00                                 |            | 1.00                                        |            | 1.00                                                                            |            |  |
| Own Occupation              | Laborer                                           | 68  | 8          | 1.88             | 0.74, 4.83 | 1.75                                 | 0.69, 4.45 | 1.80                                        | 0.73, 4.43 | 1.50                                                                            | 0.56, 4.02 |  |
|                             | Clerical or Sales                                 | 242 | 29         | 2.09             | 1.01, 4.31 | 1.75                                 | 0.84, 3.65 | 2.02                                        | 1.00, 4.10 | 1.71                                                                            | 0.80, 3.62 |  |
|                             | Homemaker                                         | 324 | 29         | 1.34             | 0.65, 2.78 | 1.27                                 | 0.61, 2.65 | 1.52                                        | 0.75, 3.09 | 1.29                                                                            | 0.61, 2.72 |  |
|                             | Professional, Executive, Supervisory or Technical | 198 | 10         | 1.00             |            | 1.00                                 |            | 1.00                                        |            | 1.00                                                                            |            |  |
| <b>Men<sup>c</sup></b>      |                                                   |     |            |                  |            |                                      |            |                                             |            |                                                                                 |            |  |
| Father's Occupation         | Laborer                                           | 316 | 43         | 0.96             | 0.63, 1.46 | 0.95                                 | 0.62, 1.47 | 0.84                                        | 0.55, 1.29 | 0.83                                                                            | 0.54, 1.29 |  |
|                             | Clerical or Sales                                 | 74  | 8          | 0.95             | 0.47, 1.94 | 0.99                                 | 0.49, 1.99 | 0.78                                        | 0.36, 1.68 | 0.79                                                                            | 0.37, 1.67 |  |
|                             | Professional, Executive, Supervisory or Technical | 392 | 48         | 1.00             |            | 1.00                                 |            | 1.00                                        |            | 1.00                                                                            |            |  |
| Own Education               | ≤12 years                                         | 265 | 38         | 1.10             | 0.64, 1.87 | 1.03                                 | 0.57, 1.88 | 0.93                                        | 0.54, 1.61 | 1.04                                                                            | 0.58, 1.87 |  |
|                             | 13-16 years                                       | 321 | 38         | 0.98             | 0.57, 1.69 | 1.02                                 | 0.61, 1.70 | 0.79                                        | 0.45, 1.37 | 0.80                                                                            | 0.47, 1.34 |  |
|                             | >16 years                                         | 196 | 23         | 1.00             |            | 1.00                                 |            | 1.00                                        |            | 1.00                                                                            |            |  |
| Own Occupation <sup>d</sup> | Laborer                                           | 269 | 39         | 1.03             | 0.67, 1.60 | 0.97                                 | 0.60, 1.57 | 0.91                                        | 0.58, 1.42 | 0.81                                                                            | 0.50, 1.33 |  |
|                             | Clerical or Sales                                 | 103 | 8          | 0.52             | 0.24, 1.10 | 0.54                                 | 0.27, 1.09 | 0.43                                        | 0.18, 0.98 | 0.49                                                                            | 0.23, 1.04 |  |
|                             | Professional, Executive, Supervisory or Technical | 408 | 52         | 1.00             |            | 1.00                                 |            | 1.00                                        |            | 1.00                                                                            |            |  |

Abbreviation: OR, odds ratio; CI, confidence interval, SEP, socioeconomic position.

<sup>a</sup>"Other SEP measures" refers to adjustment for measures of SEP other than the exposure of interest. For example analyses on father's occupation are adjusted for own education and own occupation.

<sup>b</sup> Conventional risk factors include body mass index, smoking, alcohol, and height.

<sup>c</sup> The study sample was reduced to 1,614 participants due to missing data on father's occupation (women: n=832, 76 T2D cases; men: n=782, 99 T2D cases)

<sup>d</sup> Two men were classified as homemakers and were excluded from own occupation analyses.

**Web Table 6: Pooled Logistic Regression Evaluating the Association of Social Mobility of Socioeconomic Position With Incidence of Type 2 Diabetes Using Father's Occupation as a Measure of Childhood Socioeconomic Position, Framingham Offspring Study, United States (1971-1975).**

| SEP Measure for Childhood/ Adulthood <sup>a</sup> | SEP Level in Childhood/ Adulthood | N   | No. Events | Model Adjustment |            |                                             |            |
|---------------------------------------------------|-----------------------------------|-----|------------|------------------|------------|---------------------------------------------|------------|
|                                                   |                                   |     |            | Age              |            | Age, Conventional Risk Factors <sup>b</sup> |            |
|                                                   |                                   |     |            | OR               | 95% CI     | OR                                          | 95% CI     |
| <b>Women<sup>c</sup></b>                          |                                   |     |            |                  |            |                                             |            |
| Father's Occupation/ Own Education                | Low/Low                           | 200 | 22         | 1.21             | 0.71, 2.06 | 0.89                                        | 0.49, 1.62 |
|                                                   | High/Low                          | 143 | 17         | 1.56             | 0.86, 2.86 | 1.48                                        | 0.79, 2.77 |
|                                                   | Low/High                          | 152 | 16         | 1.59             | 0.87, 2.89 | 1.21                                        | 0.63, 2.34 |
|                                                   | High/High                         | 337 | 21         | 1.00             |            | 1.00                                        |            |
| Father's Occupation/ Own Occupation               | Low/Low                           | 42  | 5          | 1.25             | 0.50, 3.16 | 0.78                                        | 0.27, 2.23 |
|                                                   | High/Low                          | 26  | 3          | 1.41             | 0.43, 4.62 | 1.35                                        | 0.32, 5.74 |
|                                                   | Low/High                          | 310 | 33         | 1.22             | 0.78, 1.90 | 0.94                                        | 0.58, 1.55 |
|                                                   | High/High                         | 454 | 35         | 1.00             |            | 1.00                                        |            |
| <b>Men<sup>c</sup></b>                            |                                   |     |            |                  |            |                                             |            |
| Father's Occupation/ Own Education                | Low/Low                           | 143 | 19         | 0.90             | 0.52, 1.56 | 0.86                                        | 0.48, 1.52 |
|                                                   | High/Low                          | 122 | 19         | 1.20             | 0.72, 2.02 | 1.40                                        | 0.82, 2.40 |
|                                                   | Low/High                          | 173 | 24         | 1.10             | 0.65, 1.86 | 1.00                                        | 0.59, 1.70 |
|                                                   | High/High                         | 344 | 37         | 1.00             |            | 1.00                                        |            |
| Father's Occupation/ Own Occupation               | Low/Low                           | 149 | 22         | 1.04             | 0.61, 1.77 | 0.95                                        | 0.55, 1.64 |
|                                                   | High/Low                          | 120 | 17         | 1.00             | 0.58, 1.72 | 0.95                                        | 0.54, 1.67 |
|                                                   | Low/High                          | 167 | 21         | 0.89             | 0.52, 1.52 | 0.78                                        | 0.45, 1.34 |
|                                                   | High/High                         | 346 | 39         | 1.00             |            | 1.00                                        |            |

Abbreviation: OR, odds ratio; CI, confidence interval, SEP, socioeconomic position.

<sup>a</sup> Measures of SEP were as follows: father's occupation (low: laborer, high: clerical/ sales/professional/ executive/supervisory/ technical), own education (low: ≤12 years, high: >12 years) and own occupation (low: laborer, high: housewife/ clerical/ sales/professional/ executive/supervisory/ technical).

<sup>b</sup> Conventional risk factors include body mass index, smoking, alcohol and height.

<sup>c</sup> The study sample was reduced to 1,614 participants due to missing data on father's occupation (women: n=832, 76 T2D cases; men: n=782, 99 T2D cases)
